# Supplementary figures and images for: Hydrothermal synthesis of a thermally stable porous supramolecular π–π framework: [{Co2(C12H8N2)4(μ-C4O4)(OH2)2}C4O4]·8H2O
Source: Royal Society of Chemistry journal article supplement (doi:10.1039/b100921o), 2001-01-01

TGA Curve for **1**:


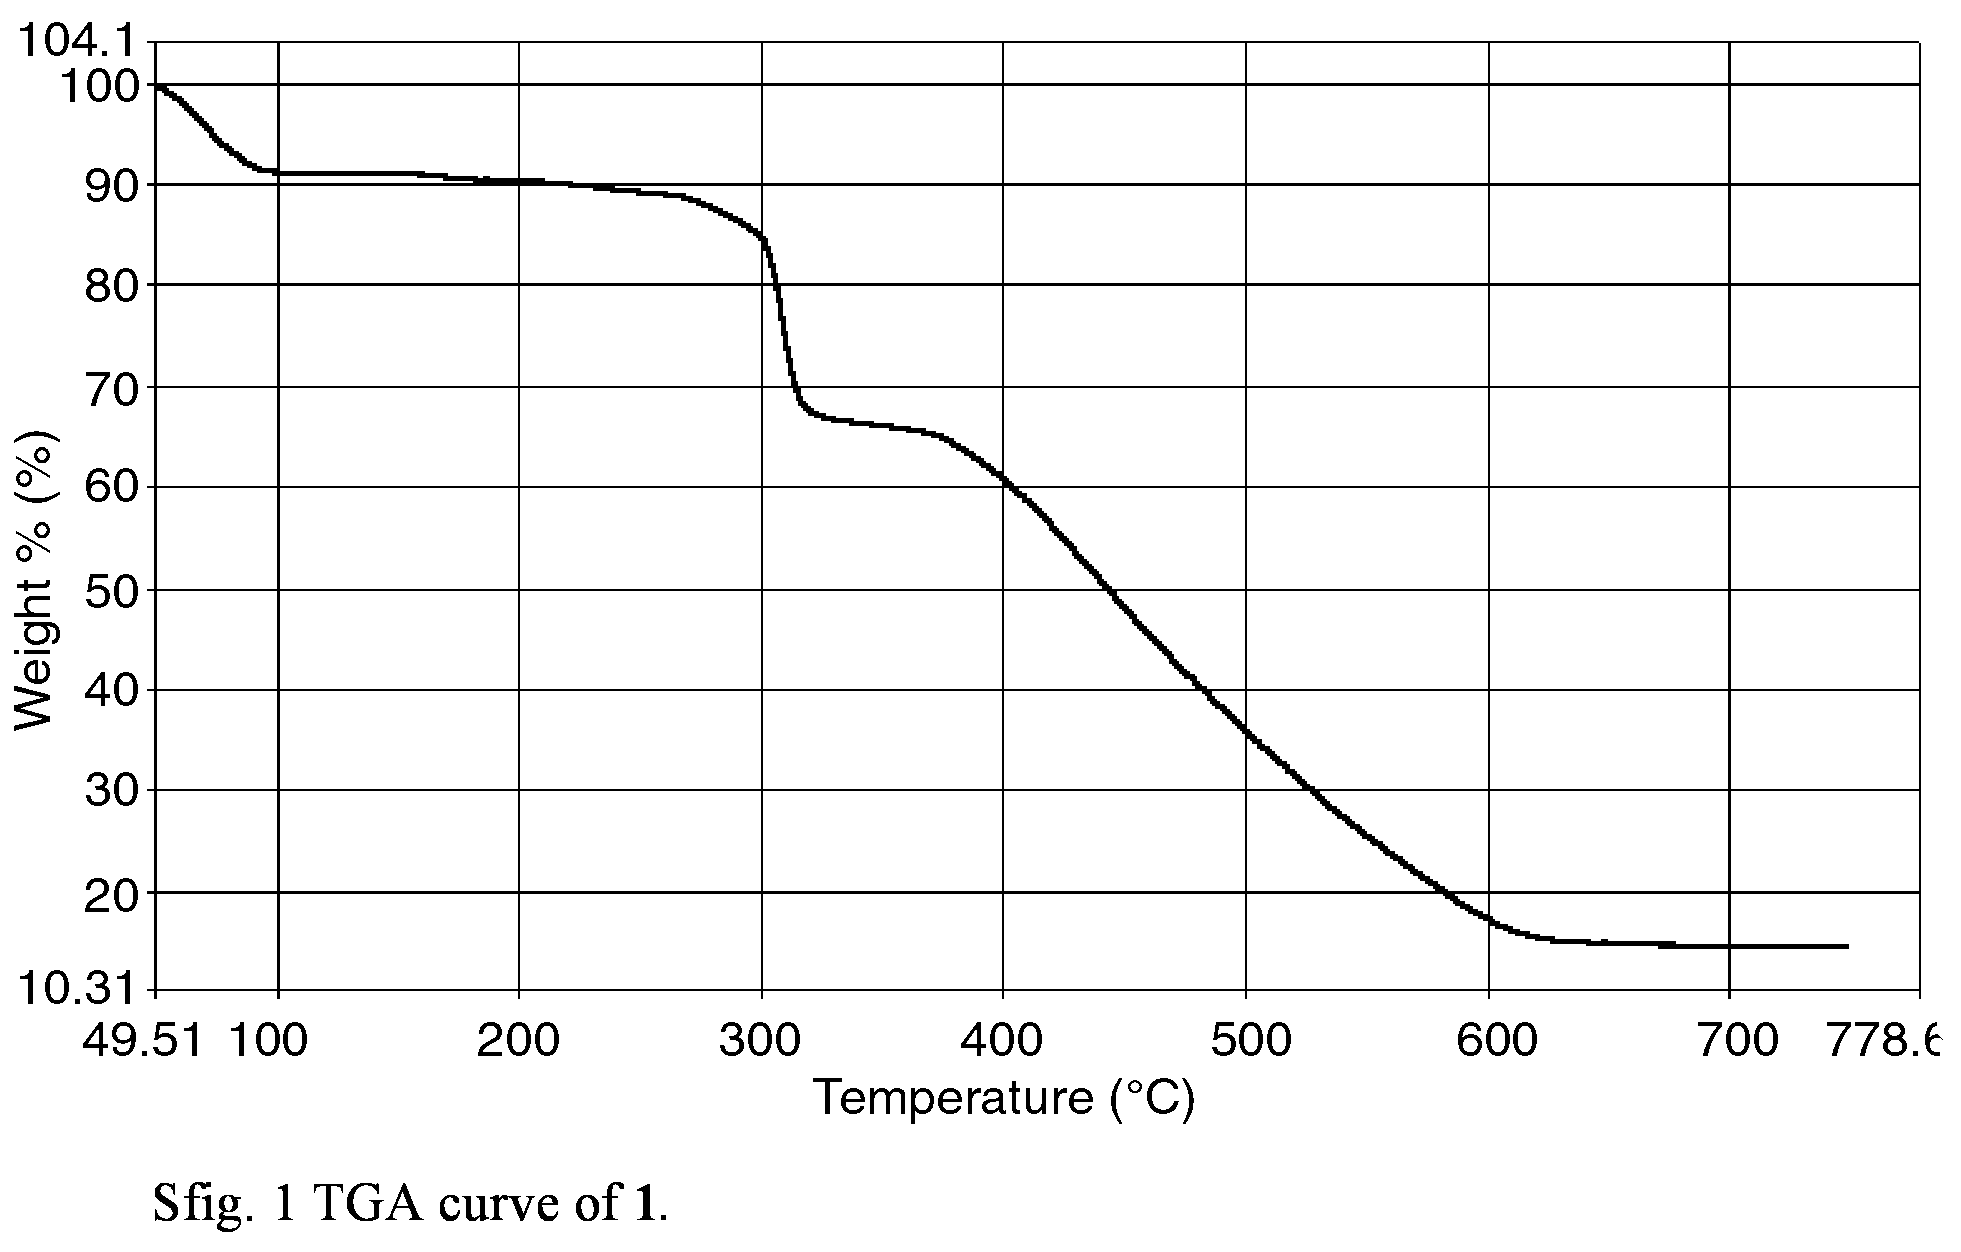

Supplement: b100921o1.doc [file b100921o1.doc]

X-Ray powder diffraction patterns:


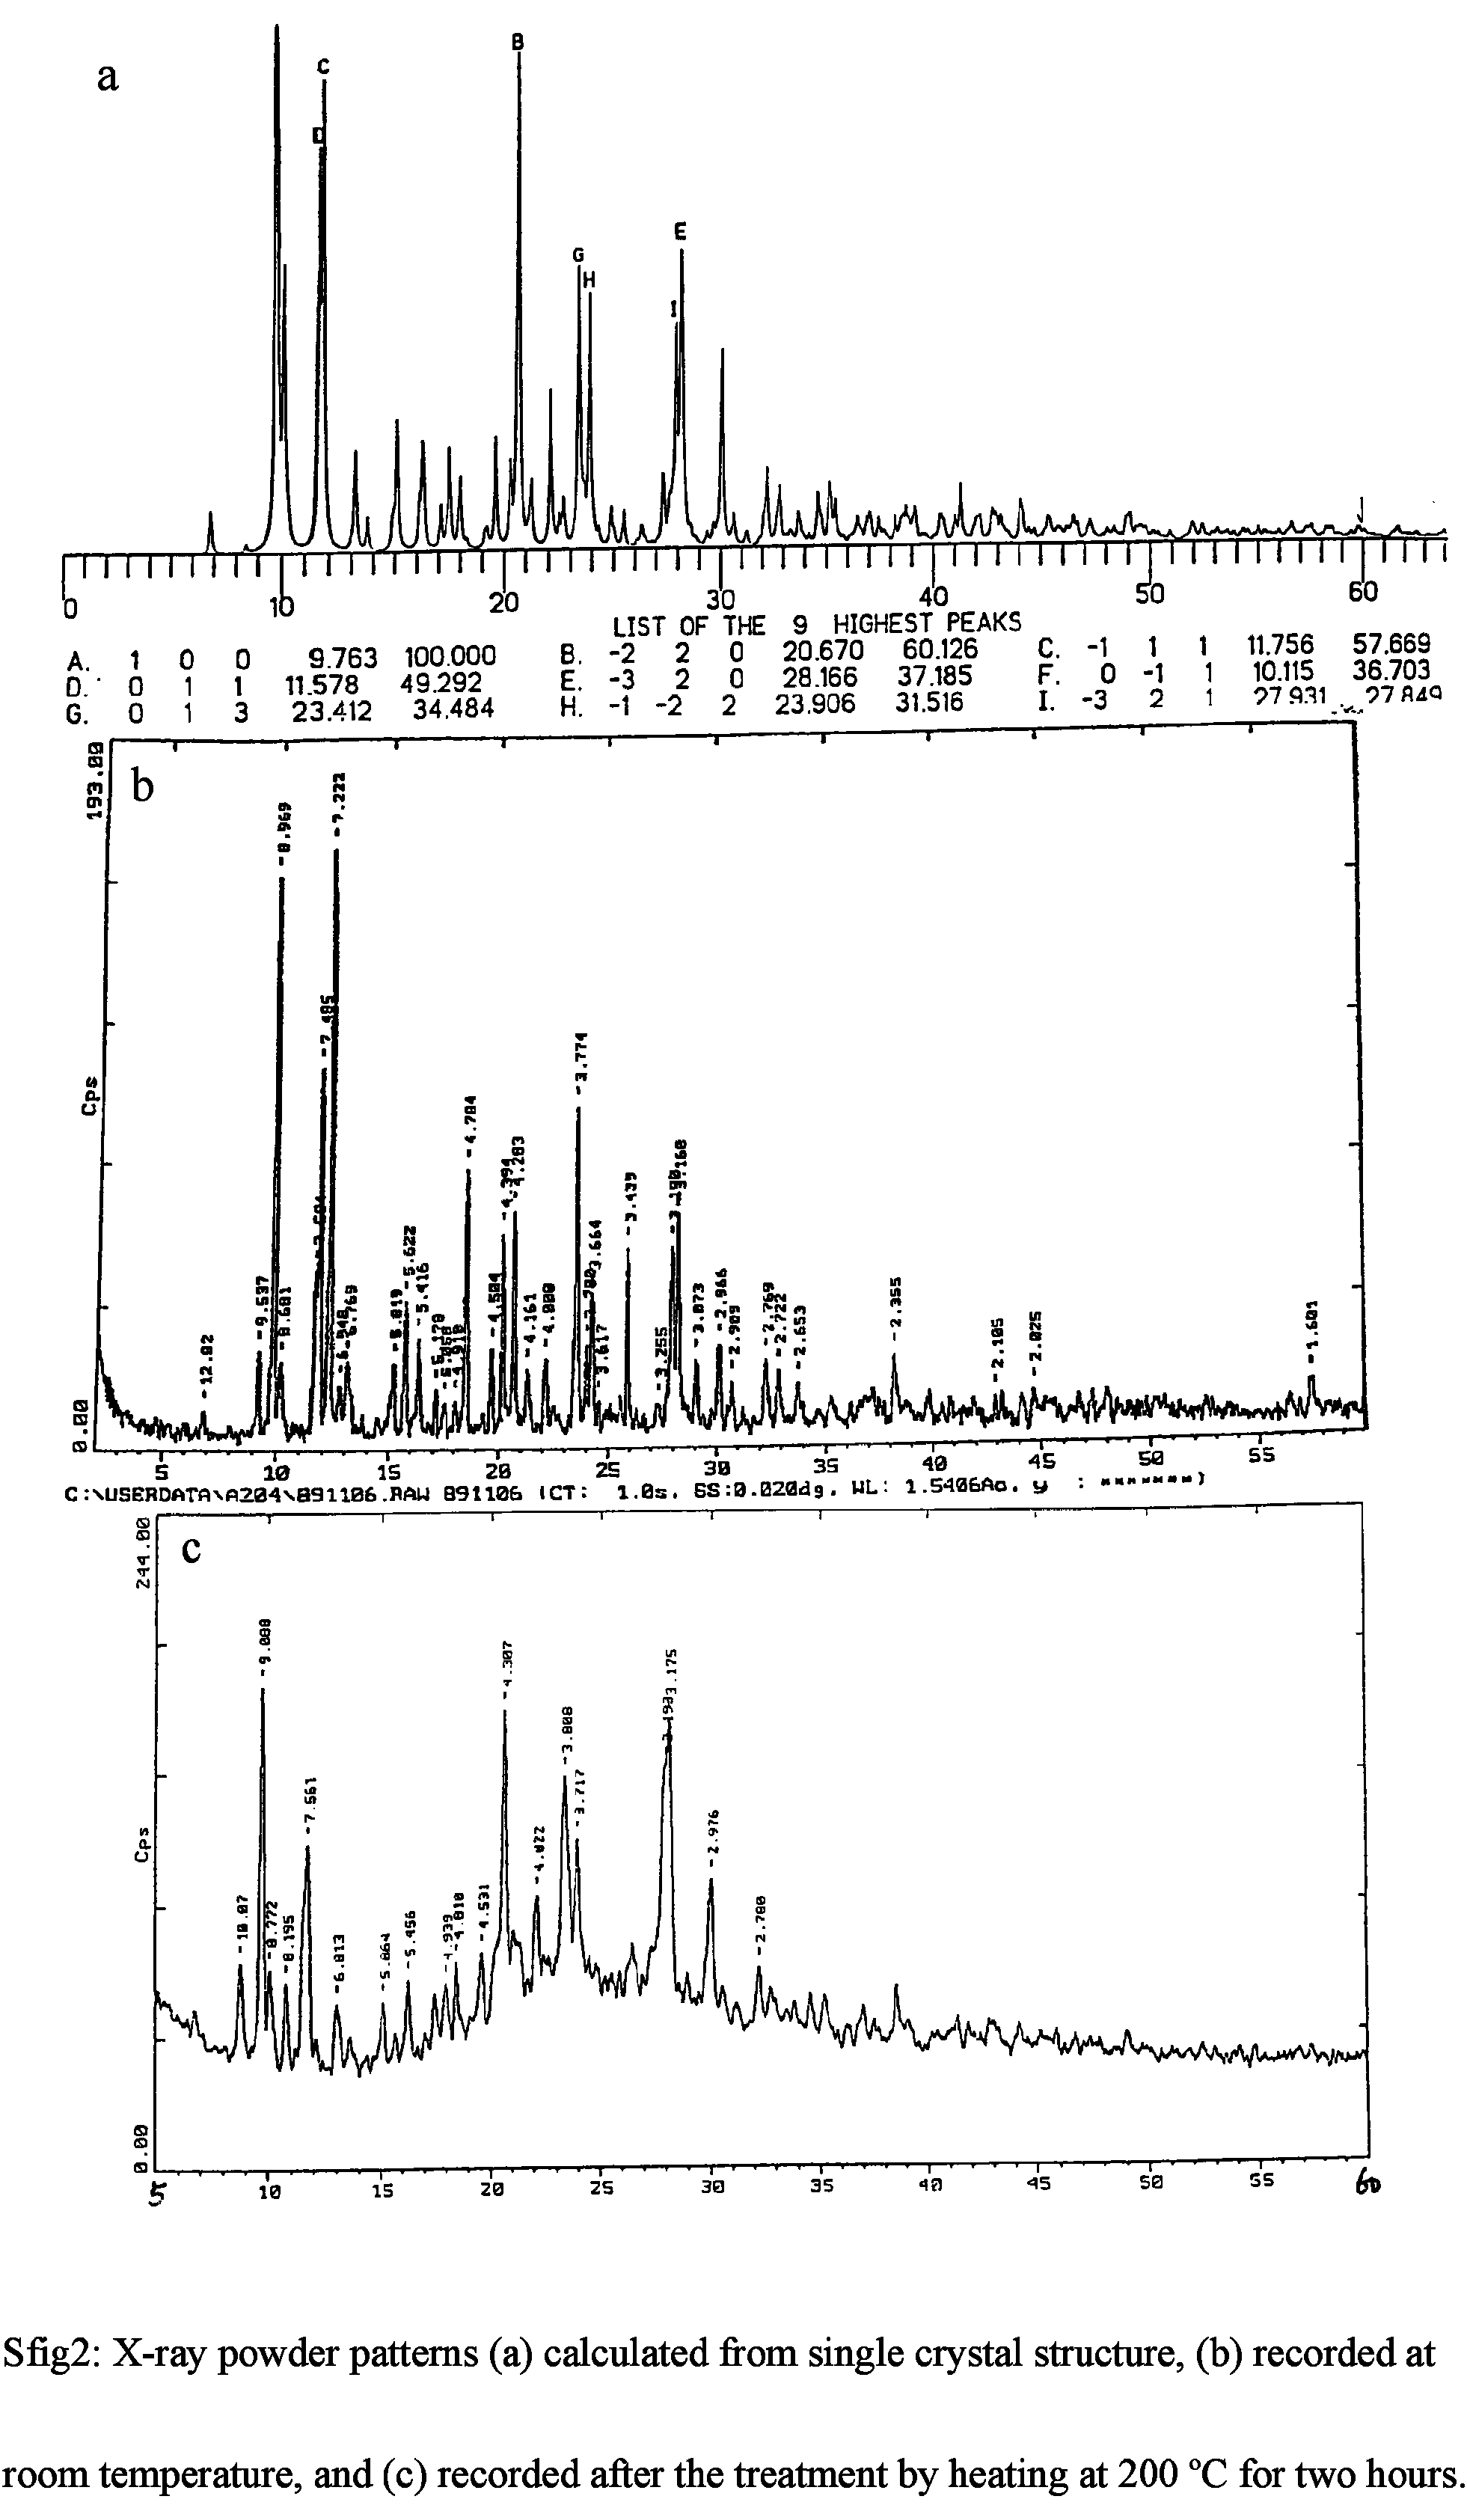

Supplement: b100921o2.doc [file b100921o2.doc]
